# Supplementary material
Source: publisher figshare collection journal article supplement (https://gsajournals.figshare.com/articles/dataset/_/12755873)
Supplement: Supplementary file 2 [file 1]

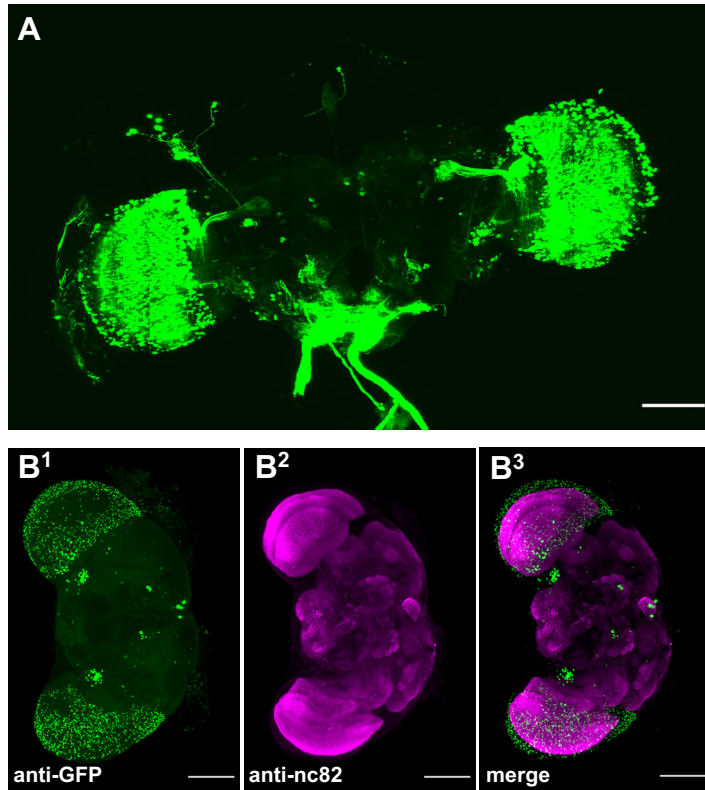

**Figure S2.** *RluA-1* expression in the adult brain of *Drosophila melanogaster*. **(A).** *RluA-1* gene expression pattern in adult brain expressing *40xUAS-mCD8::GFP* under *RluA-1<sup>GAL4</sup>* driver. GFP positive signals labeled the optical lobe photoreceptor neurons and unidentified clusters of neurons in the brain. Scale bar = 100 $\mu$ m. **(B).** In *RluA-1-GFSTF* line, the GFP positive signals are detected in the cell bodies of neurons in optical lobes and unidentified neuron clusters in the adult brain, counter-stained with the presynaptic marker nc82 (anti-Bruchpilot) (B<sup>1</sup>, GFP, green; B<sup>2</sup>: nc82, magenta; B<sup>3</sup>: merged). Scale bar = 50 $\mu$ m.
