# Supplementary material
Source: publisher figshare collection journal article supplement (https://gsajournals.figshare.com/articles/dataset/_/12755873)
Supplement: Supplementary file 4 [file 1]

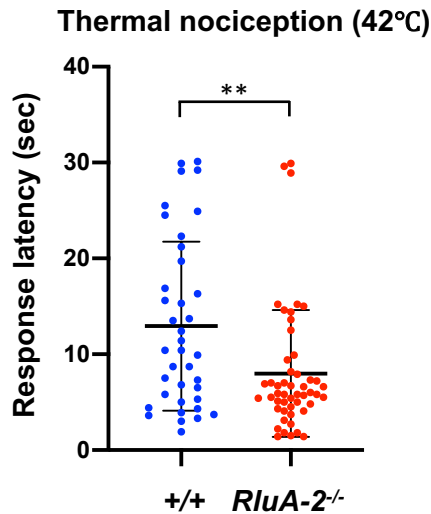

**Figure S7.** Knocking out the ubiquitously expressed *RluA-2* causes hypersensitive thermal nociception in *Drosophila* larvae in *RluA-2*<sup>del-FRT</sup> upon noxious stimulus of 42°C. An independently generated deletion mutant *RluA-2*<sup>del-FRT</sup> (*RluA-2*<sup>-/-</sup>) larvae responded significantly faster compared to the background genotype isow<sup>1118</sup> (average latency of 7.99 ± 6.62 sec in *RluA-2*<sup>-/-</sup>, n=50 vs 12.94 ± 8.81 sec in +/+, n=38). Significance of the comparison is marked as \*\* (exact p<0.01). Data were analyzed using Mann-Whitney unpaired test.
