# Supplementary material
Source: publisher figshare collection journal article supplement (https://gsajournals.figshare.com/articles/dataset/_/12755873)
Supplement: Supplementary file 5 [file 1]

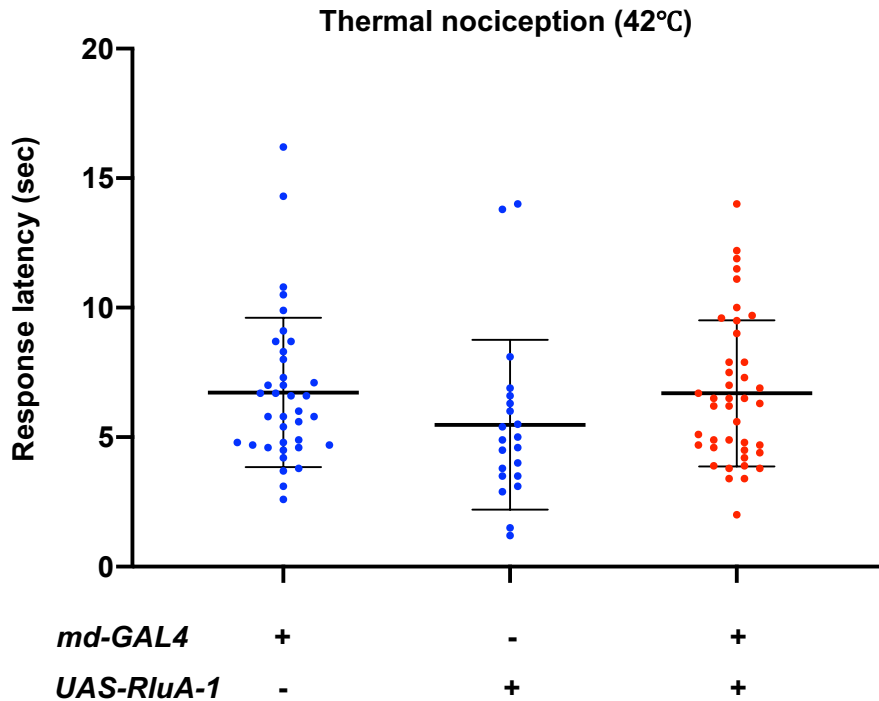

**Figure S5.** Overexpressing *UAS-RluA-1* in larval sensory neurons using *md-GAL4* has no effect on the larval thermal nociception at 42°C noxious stimulus. Larvae expressing *UAS-RluA-1* under the *md-GAL4* driver showed no significant difference from the *md-GAL4* driver alone or *UAS-RluA-1* alone control larvae (average latency of  $6.69 \pm 2.81$  sec in *md-GAL4*<sup>+/+</sup>; *UAS-RluA-1*<sup>+/+</sup>, n=41 vs  $6.73 \pm 2.89$  sec in *md-GAL4*<sup>+/+</sup>, n=37 or  $5.48 \pm 3.28$  sec in *UAS-RluA-1*<sup>+/+</sup>, n=21). Data were analyzed using Kruskal-Wallis test with Dunn's multiple comparison tests.
