# Supplementary material
Source: publisher figshare collection journal article supplement (https://gsajournals.figshare.com/articles/dataset/_/12755873)
Supplement: Supplementary file 6 [file 1]

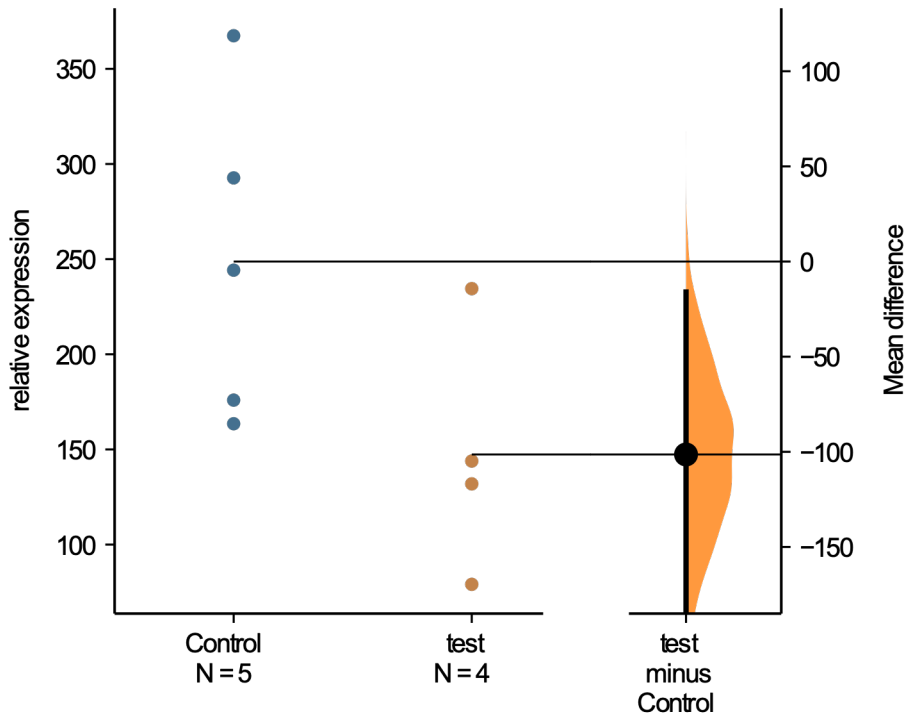

**Figure S3.** Quantitative RT-PCR analysis of *RluA-1* RNAi knockdown. The mean difference of relative *RluA-1* expression (normalized by the amount of *Actin5C* mRNA) between Control ( $w^{1118}; md-GAL4/+; UAS-dicer$ ) and test ( $w^{1118}; md-GAL4/+; UAS-dicer/UAS-RluA-1-RNAi$ ) is shown in the Gardner-Altman estimation plot. Both groups are plotted on the left axes; the mean difference is plotted on a floating axes on the right as a bootstrap sampling distribution. The mean difference is depicted as a dot; the 95% confidence interval is indicated by the ends of the vertical error bar. The unpaired mean difference between Control and test is  $-1.01e+02$  [95.0%CI  $-1.85e+02, -16.0$ ] (effect size [CI width lower bound; upper bound]). The P value of the two-sided permutation t-test is 0.086. For each permutation P value, 5000 reshuffles of the control and test labels were performed.
