# Supplementary material
Source: publisher figshare collection journal article supplement (https://gsajournals.figshare.com/articles/dataset/_/12755873)
Supplement: Supplementary file 7 [file 1]

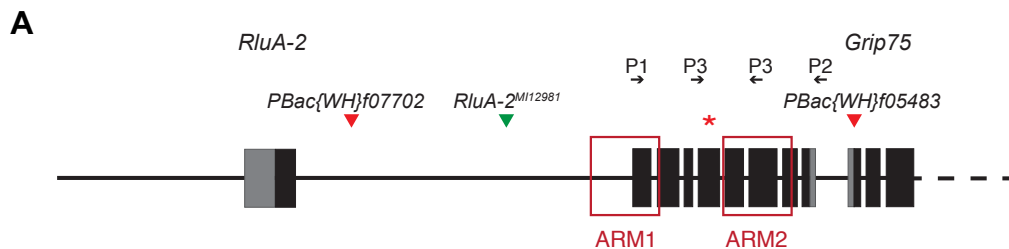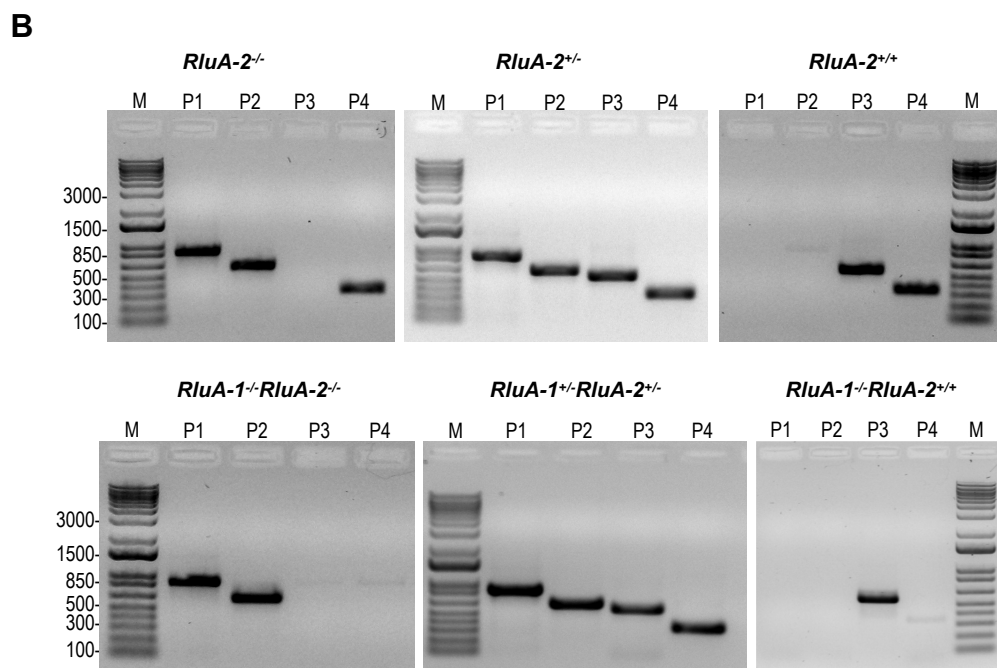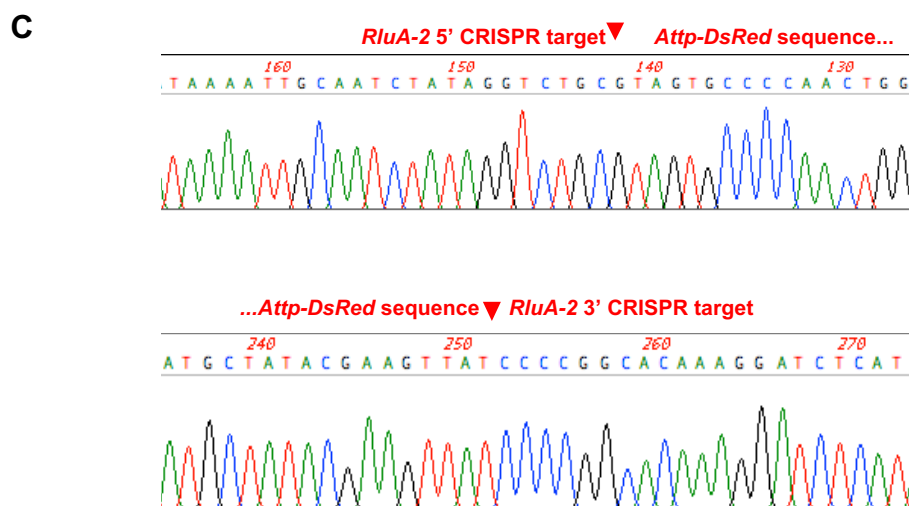

**Figure S6.** Generation and confirmation of *RluA-2* single deletion allele *RluA-2<sup>del-HDR</sup>* and double deletion allele *RluA-1<sup>del-HDR</sup> RluA-2<sup>del-HDR</sup>*. **(A).** Schematic of *RluA-2* gene locus. UTRs are represented as grey boxes, exons as black boxes and introns as black lines (drawn to scale). Partial sequence of the downstream gene *Grip75* was also shown. Homology arms (“ARM1” and “ARM2”) immediately flanking the CRISPR cleavage sites are marked as red rectangles. The red triangles mark the locations of the two insertions, *PBac{WH}f07702* and *PBac{WH}f05483* used to generate the *RluA-2<sup>del-FRT</sup>* allele. The green triangle marks the location of the coding intron localized MiMIC line (*RluA-2<sup>MI12981</sup>*) used for generating the *RluA-2-GFSTF* line. Red star (\*) indicates the location of the aspartate residue conserved in all pseudouridine synthases. The approximate locations of primer P1-F, P2-R, and P3 used for PCR confirmation (**Figure S4B**) were also shown. P1-R and P2-F are located on *attP-DsRed* cassette as shown in **Figure S2A** while the P3 primers located on *RluA-1* as shown in **Figure S2A** are used as P4 in **Figure S4B**. **(B).** PCR verification of single mutant *RluA-2<sup>del-HDR</sup>* and double mutant *RluA-1<sup>del-HDR</sup> RluA-2<sup>del-HDR</sup>*. **Upper panel:** Single mutant allele *RluA-2<sup>del-HDR</sup>* over the deficiency *Df(2L)Exel7048* (“*RluA-2<sup>-/-</sup>*”) amplified the expected products from P1 (5’ border of *RluA-2* and *attP-DsRed* cassette, P1-F: 5’-TGCTCTATGTTTGCTTCCTGGCT-3’, P1-R: Hsp70-R, expected product length: 866bp), P2 (3’ border of *attP-DsRed* cassette and *RluA-2*, P2-F: SV40-F, P1-R: 5’-CACGACGATAAATAACTCCACG-3’, expected product length: 744bp), and P4 (*RluA-1* pseudouridine-synthase domain containing region, 341bp), but not from the deleted region in *RluA-2* with P3 (562bp). Siblings of *RluA-2<sup>del-HDR</sup>* over CyO (“*RluA-2<sup>+/+</sup>*”) amplified all of the expected products from P1, P2, P3 and P4 while the injection line 2 (*Nos-Cas9*, “*RluA-2<sup>+/+</sup>*”) failed to amplify from P1 and P2 but amplified the expected products with P3 and P4. **Bottom panel:** Double mutant alleles *RluA-1<sup>del-HDR</sup>RluA-2<sup>del-HDR</sup>* over the deficiency *Df(2L)Exel7048* (“*RluA-1<sup>-/-</sup>RluA-2<sup>-/-</sup>*”) amplified the expected products from P1 (5’ border of *RluA-2* and *attP-DsRed* cassette, 866bp), P2 (3’ border of *attP-DsRed* cassette and *RluA-2*, 744bp), but not from the deleted region in *RluA-2* with P3 and deleted region in *RluA-1* with P4. Siblings of *RluA-1<sup>del-HDR</sup>RluA-2<sup>del-HDR</sup>* over CyO (“*RluA-1<sup>+/+</sup>RluA-2<sup>+/+</sup>*”) amplified all of the expected products from P1, P2, P3 and P4 while the injection line 3 (*RluA-1*; *Nos-Cas9*, “*RluA-1<sup>-/-</sup>RluA-2<sup>+/+</sup>*”) failed to amplify from P1 and P2 and P4 but amplified the expected products with P3. M represents the 1kb-plus molecular ladder (Invitrogen). **(C):** Sequencing verification of single mutant *RluA-2<sup>del-HDR</sup>* and double mutant *RluA-1<sup>del-HDR</sup> RluA-2<sup>del-HDR</sup>*. Sanger sequencing chromatographs at the 5’ CRISPR site (upper) and 3’ CRISPR site (bottom) show *RluA-2* genomic sequences are replaced with the *attP-DsRed* replacement cassette fragment in single mutant *RluA-2<sup>del-HDR</sup>* or the double mutant *RluA-1<sup>del-HDR</sup> RluA-2<sup>del-HDR</sup>* at the indicated 5’ and 3’ *RluA-1*-CRISPR target cut sites (marked with red arrow heads).
